# Supplementary material
Source: PubMed Central journal article supplement (PMC2423808)
Supplement: NIHMS43965-supplement-supp_methods_3.pdf [file NIHMS43965-supplement-supp_methods_3.pdf]

## Compensation and gate setup

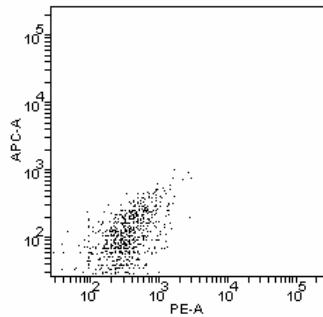

Control unstained

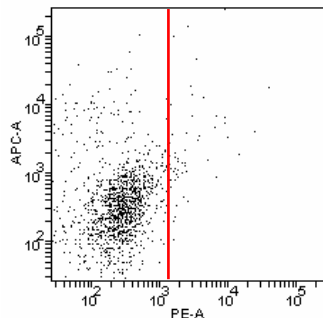

Control APC only

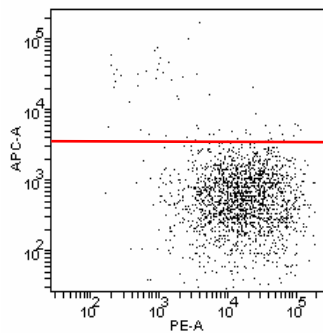

Control PE only

CD24-PE

ALDEFLUOR-negative

ALDEFLUOR-positive

## Analysis

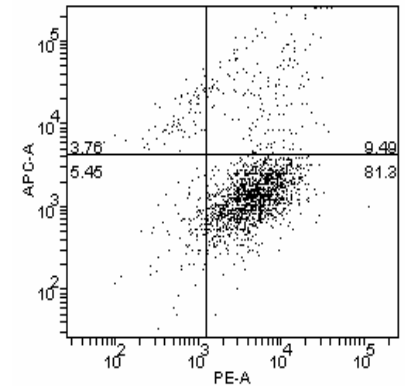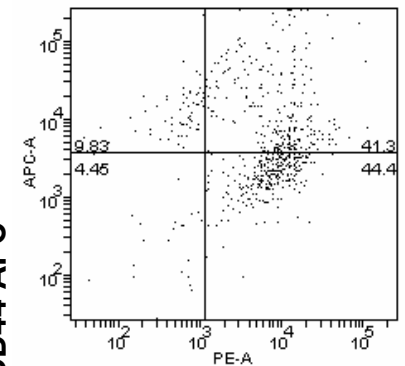

CD44-APC

CD24-PE

**Supplementary methods 3.** Analysis of the cell populations defined by the ALDEFLUOR and CD44CD24lin<sup>-</sup> phenotypes in the UM2 tumor. The ALDEFLUOR-positive population in UM2 showed a considerably higher fluorescence compared to the other tumors (Supplementary Fig. 3). This required compensation and different gate setup for the analysis of the markers CD44CD24lin<sup>-</sup>, as shown in the flow chart on the left side of the figure .
