# Supplementary material
Source: PubMed Central journal article supplement (PMC2423808)

Section 1

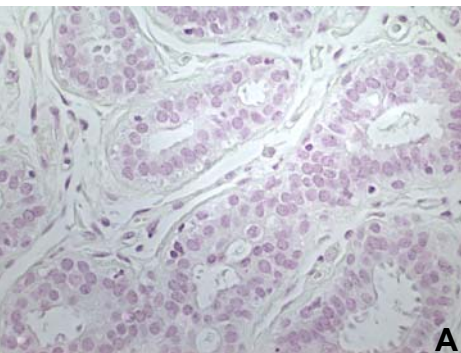

A

Section 2

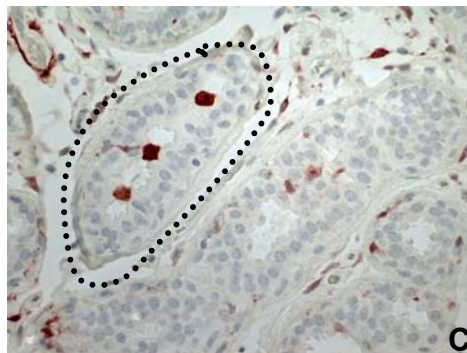

C

Section 3

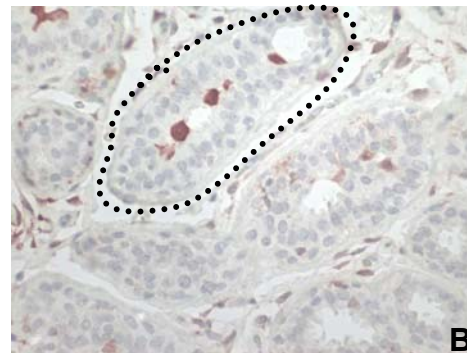

B

Section 4

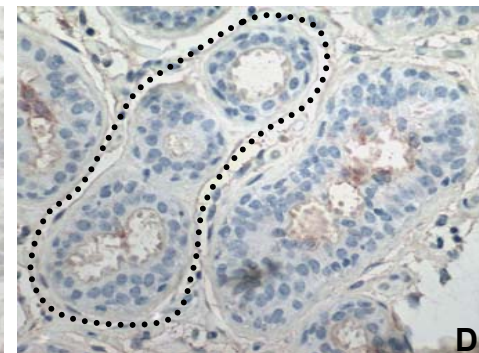

D

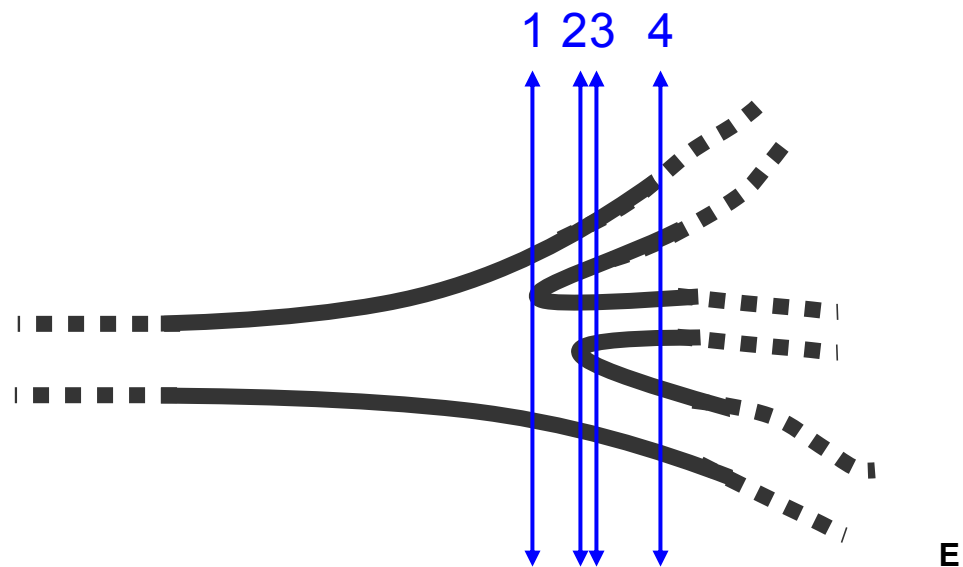

Supplement: NIHMS43965-supplement-figS2.pdf [file NIHMS43965-supplement-figS2.pdf]

ALDEFLUOR-negative

ALDEFLUOR-positive

CD44-APC

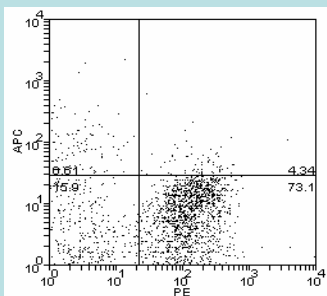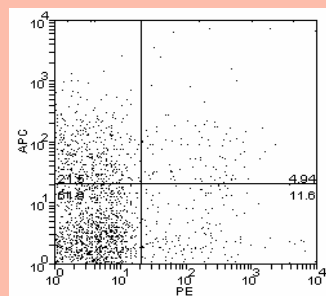

MC1

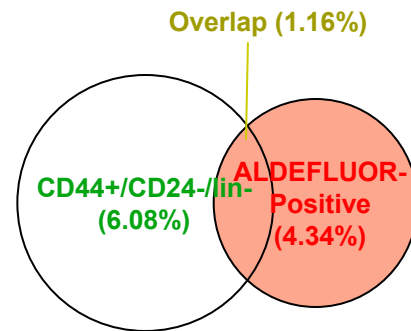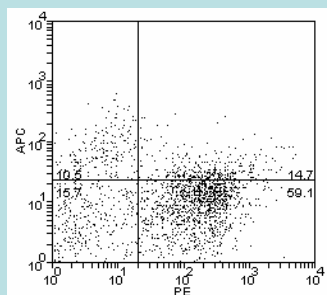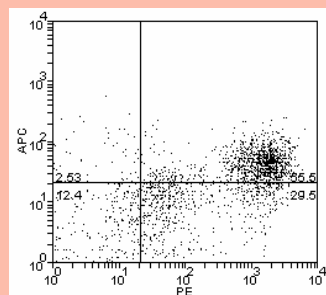

UM1

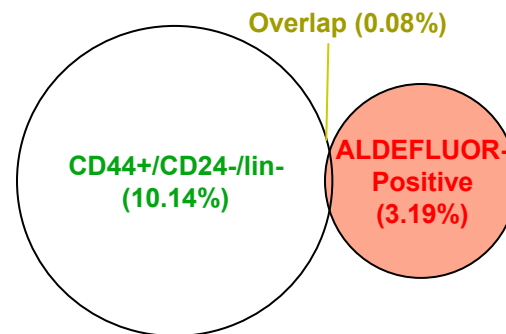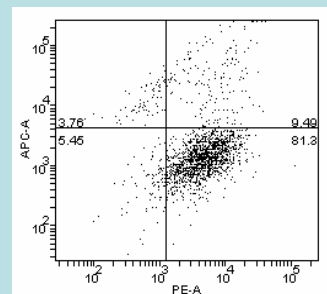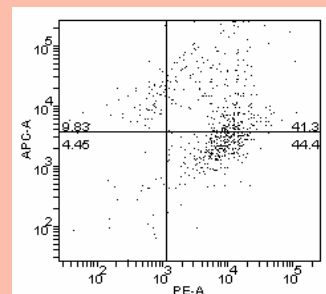

UM2

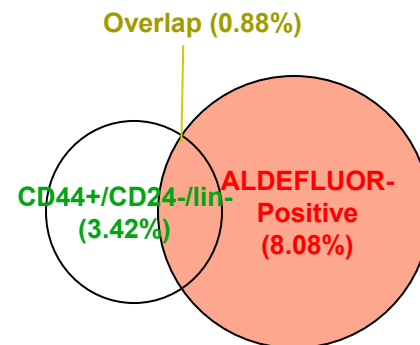

CD24-PE

Supplement: NIHMS43965-supplement-figS4.pdf [file NIHMS43965-supplement-figS4.pdf]
